# Supplementary material for: SAV1 promotes Hippo kinase activation through antagonizing the PP2A phosphatase STRIPAK
Source: eLife journal article supplement (doi:10.7554/elife.30278), 2017-10-24
Supplement: supp [file elife-30278-supp-v1.zip]

Archive with 9 entries (9 files):
- elife_poa_e30278_Figure_1_figure_supplement_2.pdf
- elife_poa_e30278_Figure_5_figure_supplement_2.pdf
- elife_poa_e30278_Figure_5_figure_supplement_1.pdf
- elife_poa_e30278_Transparent_Reporting_File.pdf
- elife_poa_e30278_Figure_2_figure_supplement_1.pdf
- elife_poa_e30278_Figure_4_figure_supplement_1.pdf
- elife_poa_e30278_Figure_7_figure_supplement_1.pdf
- elife_poa_e30278_Figure_1_figure_supplement_1.pdf
- elife_poa_e30278_Figure_6_figure_supplement_1.pdf
