# Supplementary material for: SAV1 promotes Hippo kinase activation through antagonizing the PP2A phosphatase STRIPAK
Source: eLife journal article supplement (doi:10.7554/elife.30278), 2017-10-24
Supplement: supp [file elife-30278-supp-v1.zip › elife_poa_e30278_Figure_7_figure_supplement_1.pdf]

**A**

SLMAP gDNA: GTGACATTATCCAGTTTGGAGTAGACGTGACAGAGAATAC  
CACTGTAATAGGTCAAACCTCATCTGCACTGTCTCTTATG  
                    PAM                    sgRNA

293FT allele: CACTGTAATAGGTCAACACCTCATCTGCACTGTCTCTTATG

MCF10A allele: CACTGTAATAGGTCA-----TCTGCACTGTCTCTTATG

**B**

SAV1 gDNA: AGTGTACCTCGGTATGATCAACCACCTCCTGTCACATACC  
TCACATGGAGCCATACTAGTTGGTGGAGGACAGTGTATGG  
                    PAM                    sgRNA

MCF10A allele1: TCACA-----GGAGGACAGTGTATGG

MCF10A allele2: TCACATGGAGCC-TACTAGTTGGTGGAGGACAGTGTATGG

**Figure 7-figure supplement 1**
