# Supplementary figures and images for: SAV1 promotes Hippo kinase activation through antagonizing the PP2A phosphatase STRIPAK
Source: eLife journal article supplement (doi:10.7554/elife.30278), 2017-10-24

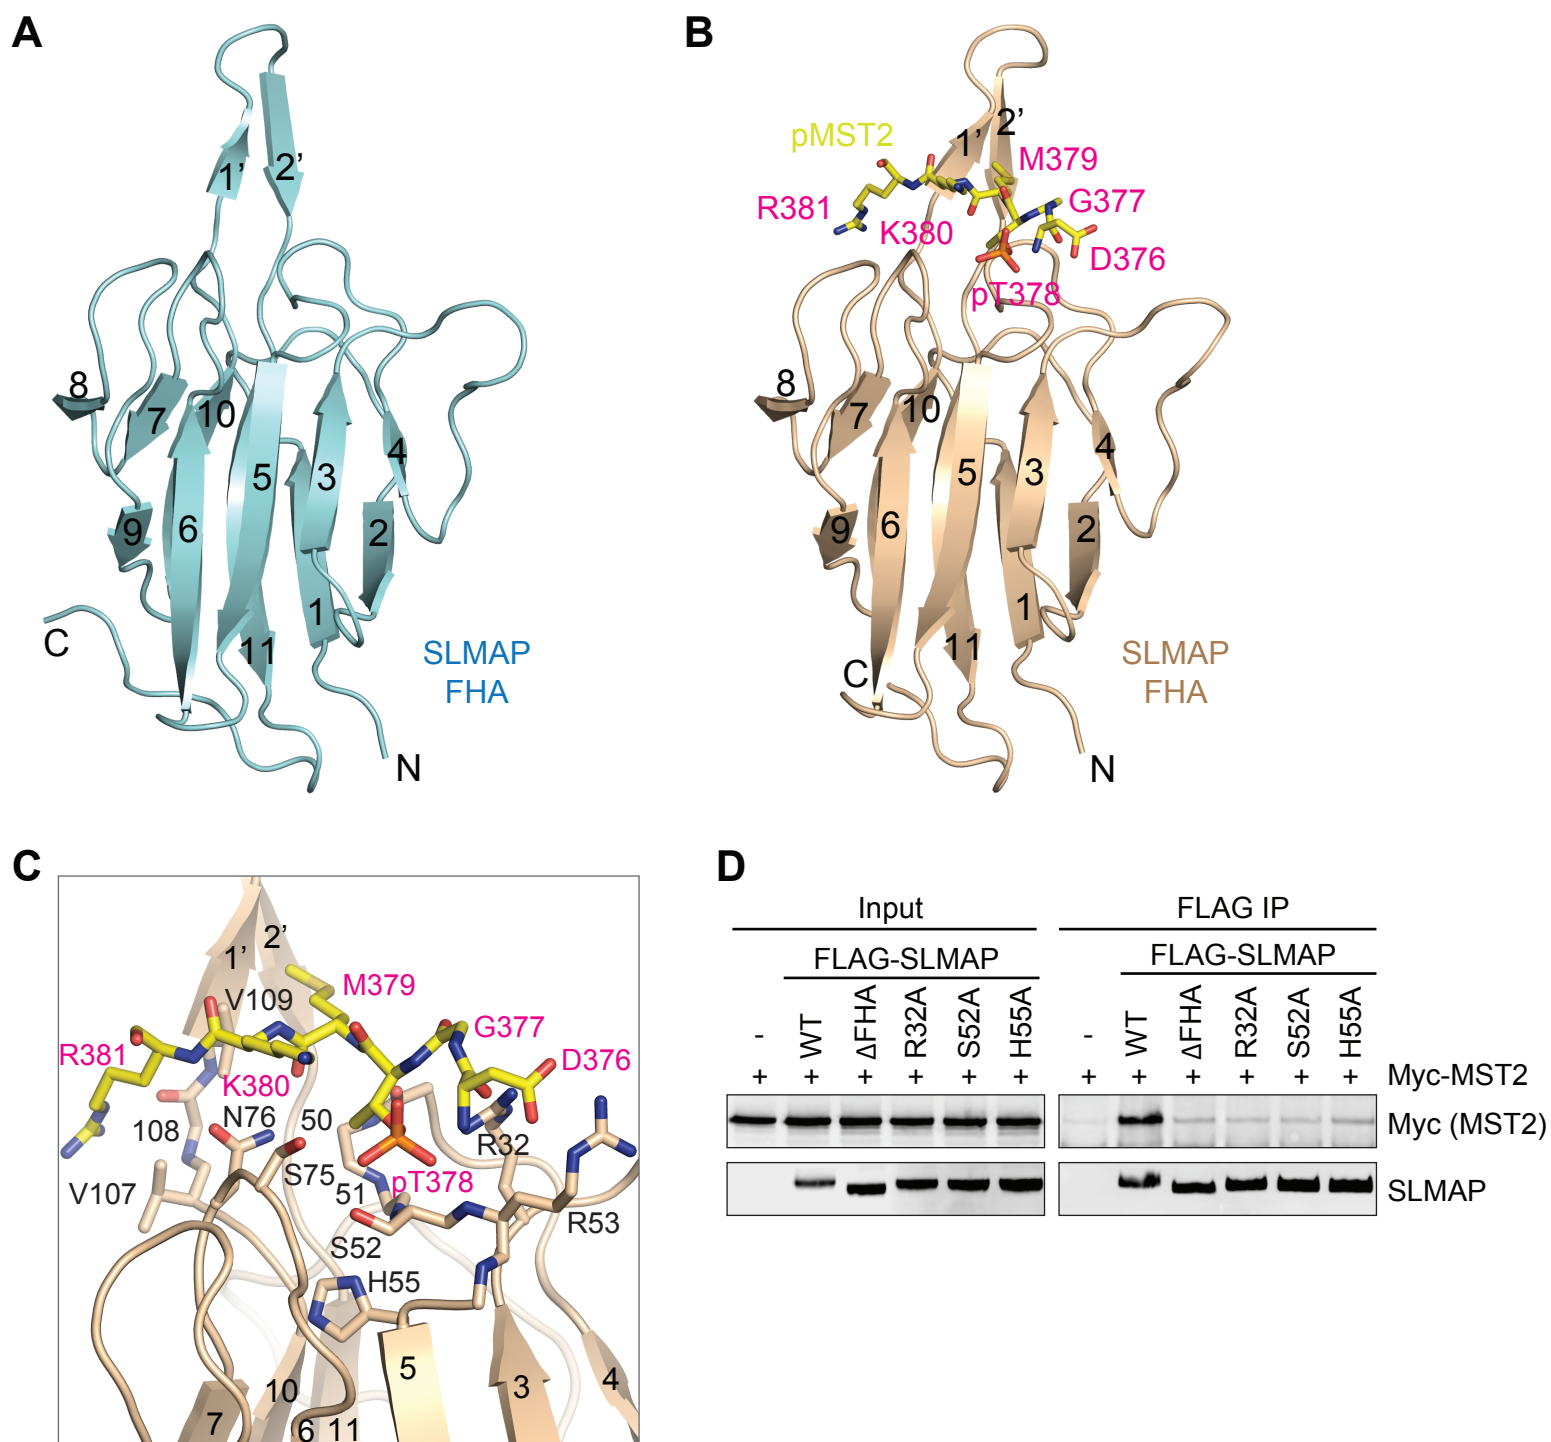

**Figure 1-figure supplement 2**

Supplement: supp [file elife-30278-supp-v1.zip › elife_poa_e30278_Figure_1_figure_supplement_2.pdf]

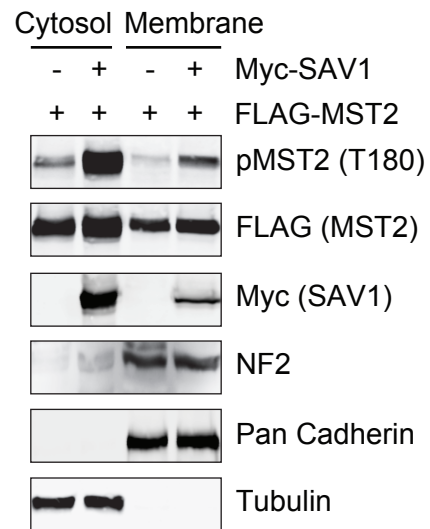

**Figure 5-figure supplement 2**

Supplement: supp [file elife-30278-supp-v1.zip › elife_poa_e30278_Figure_5_figure_supplement_2.pdf]

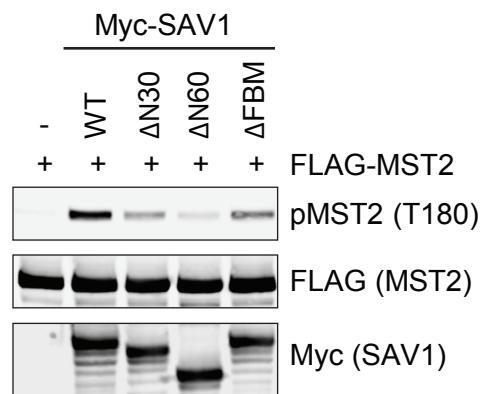

**Figure 5-figure supplement 1**

Supplement: supp [file elife-30278-supp-v1.zip › elife_poa_e30278_Figure_5_figure_supplement_1.pdf]

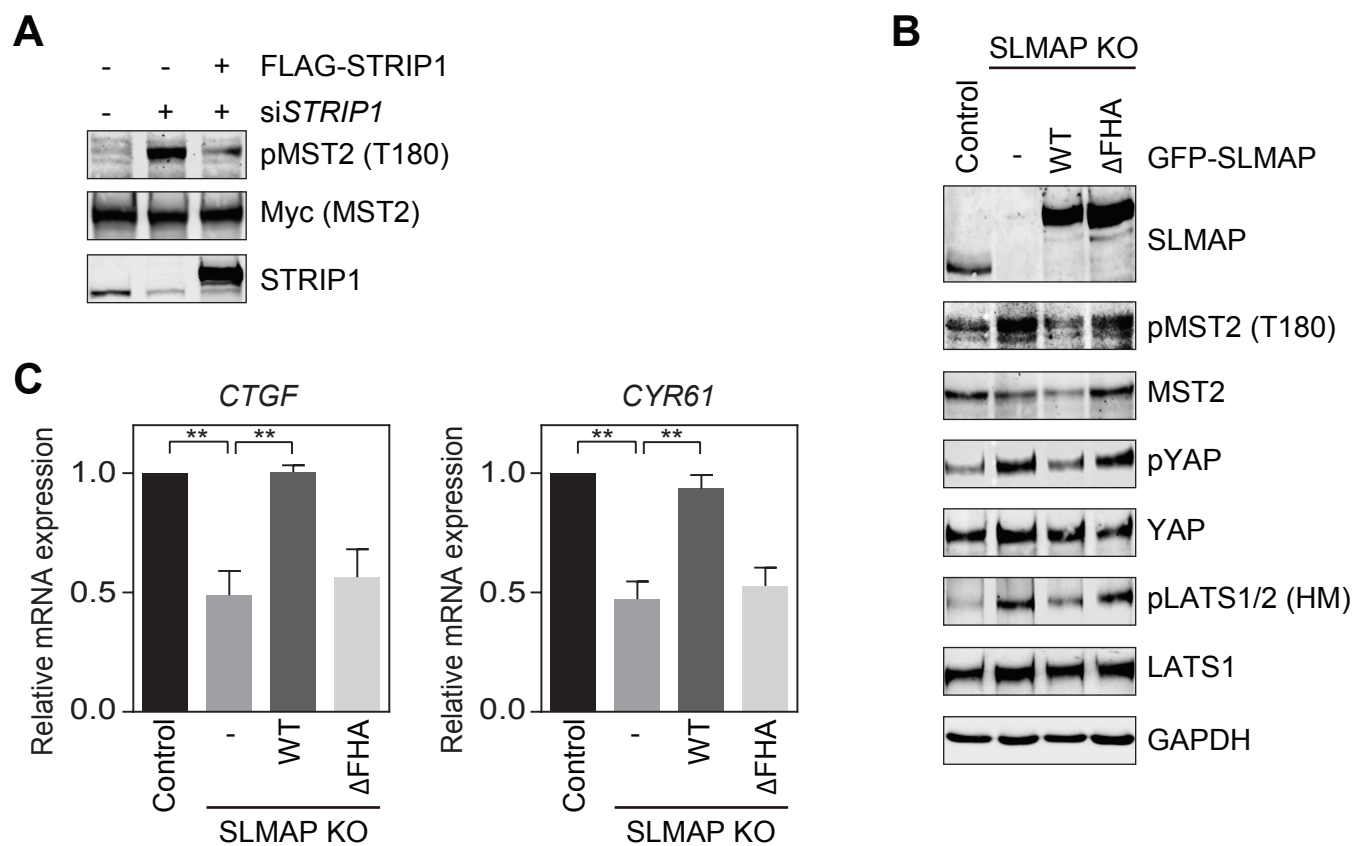

**Figure 2-figure supplement 1**

Supplement: supp [file elife-30278-supp-v1.zip › elife_poa_e30278_Figure_2_figure_supplement_1.pdf]

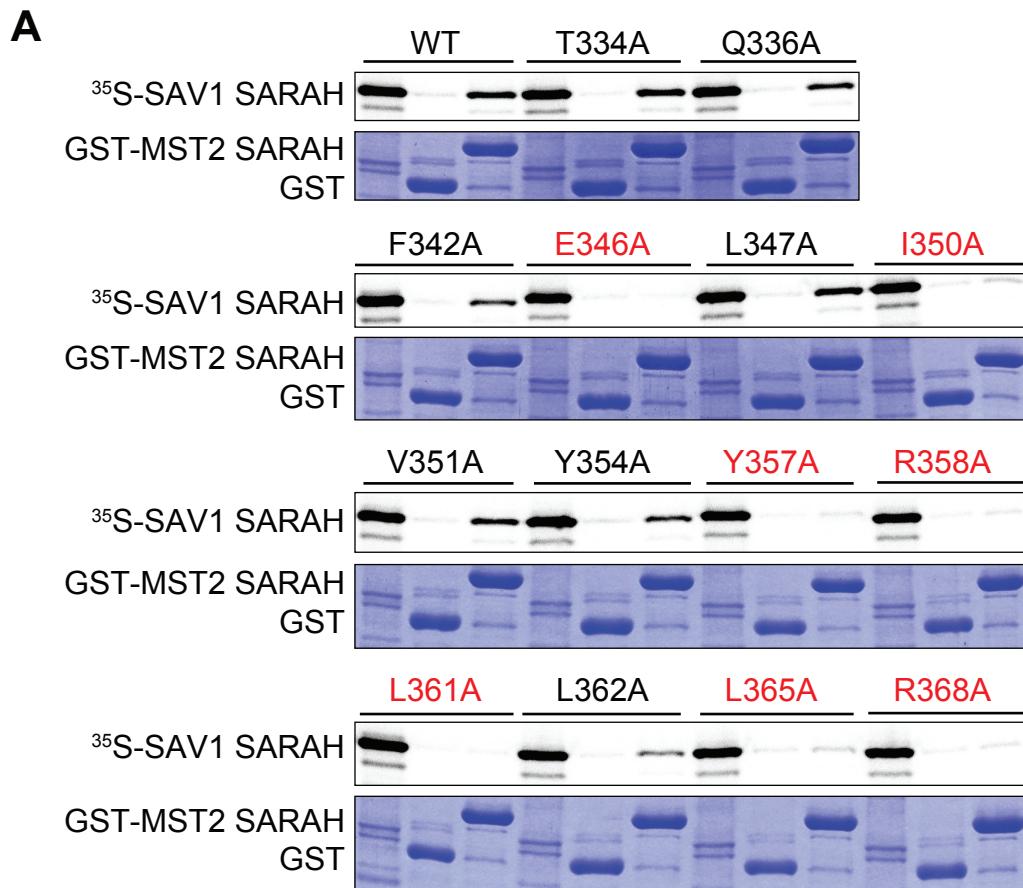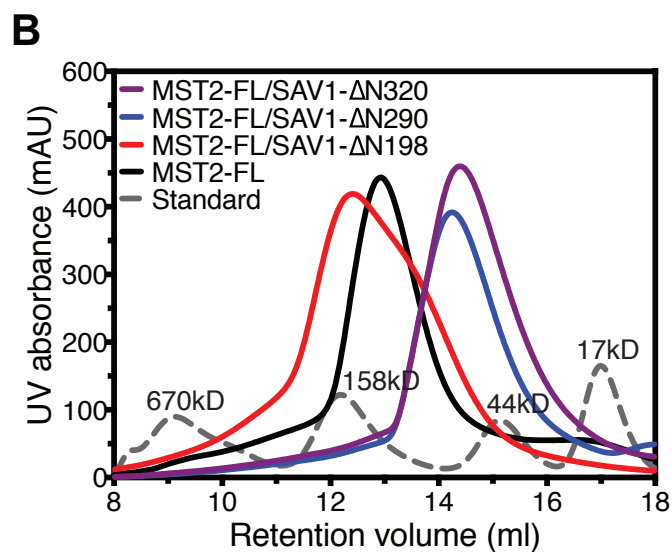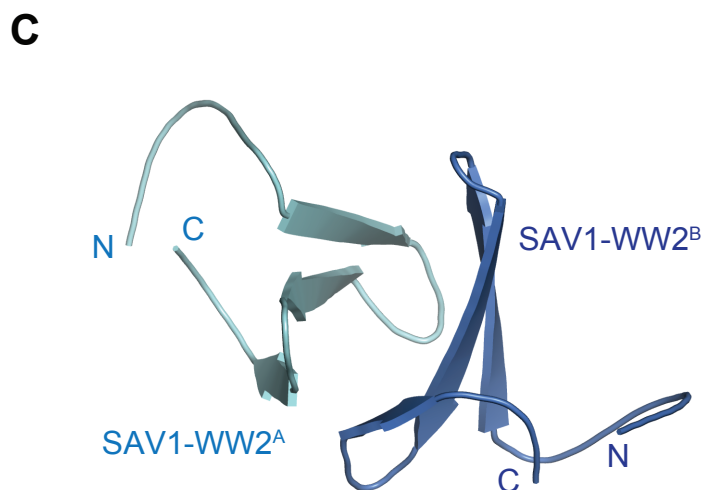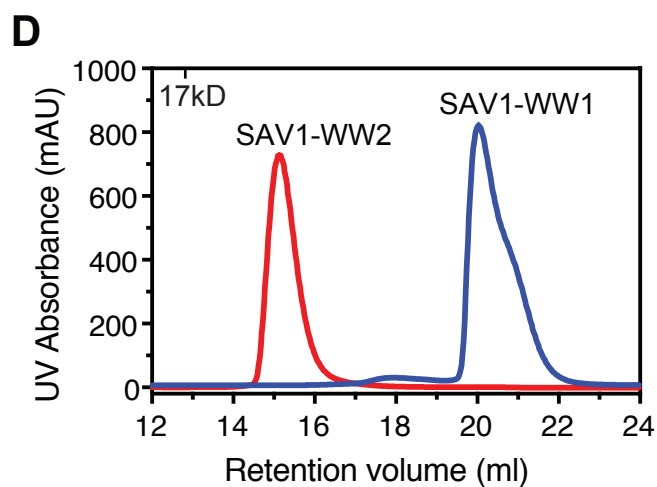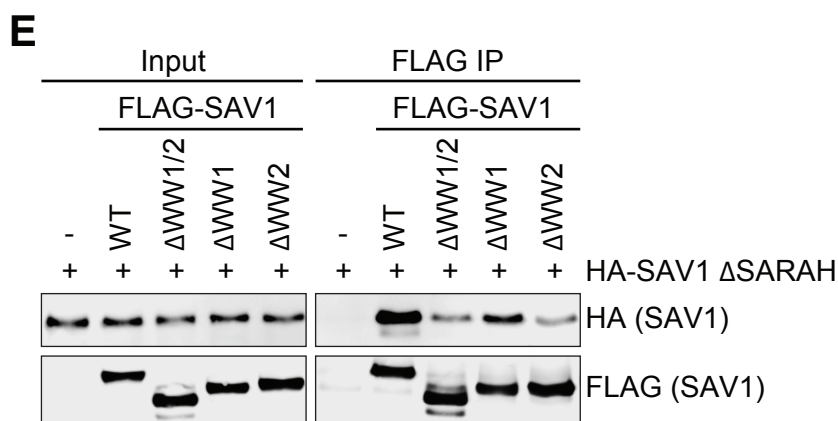

**Figure 4-figure supplement 1**

Supplement: supp [file elife-30278-supp-v1.zip › elife_poa_e30278_Figure_4_figure_supplement_1.pdf]

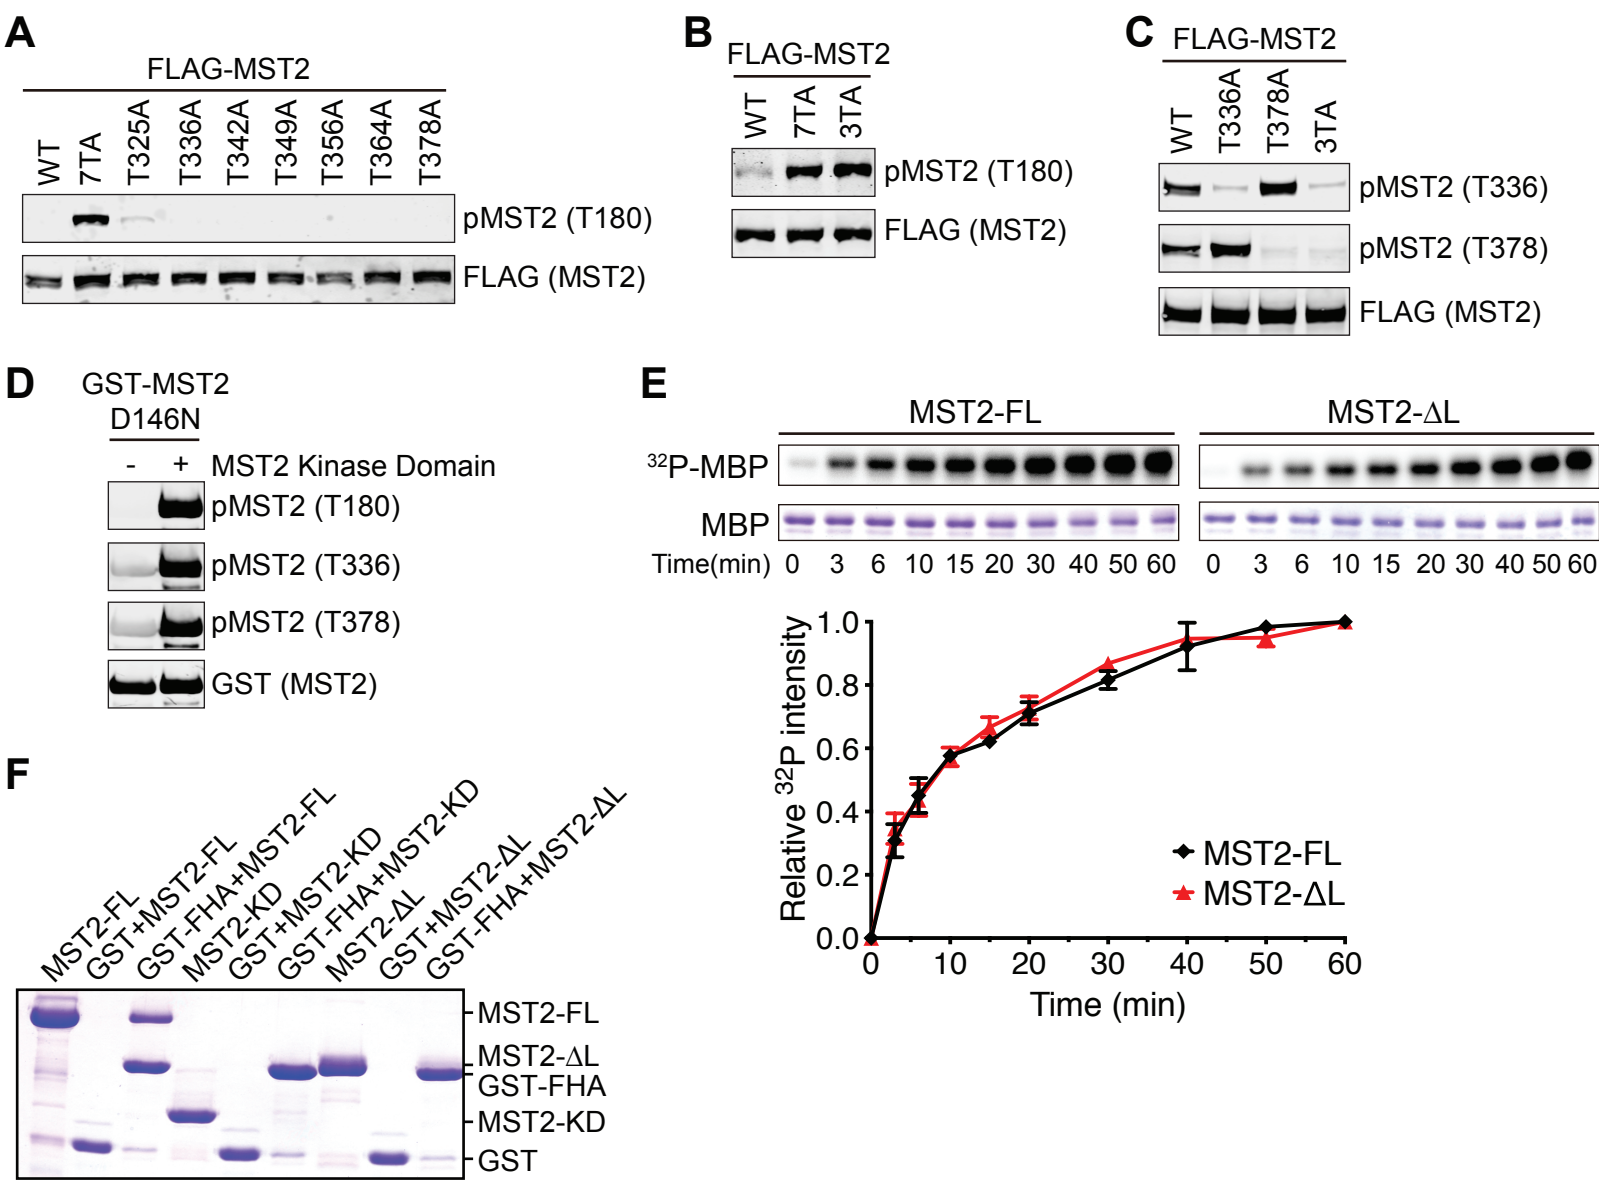

Figure 1-figure supplement 1

Supplement: supp [file elife-30278-supp-v1.zip › elife_poa_e30278_Figure_1_figure_supplement_1.pdf]

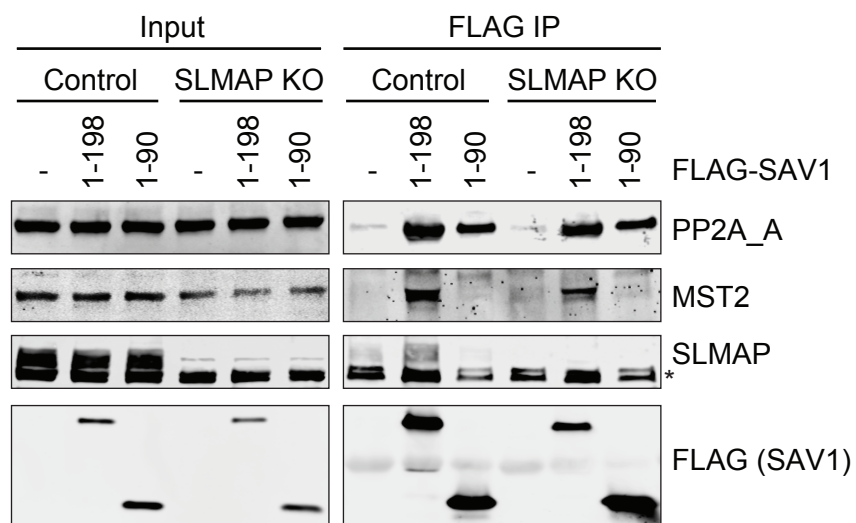

**Figure 6-figure supplement 1**

Supplement: supp [file elife-30278-supp-v1.zip › elife_poa_e30278_Figure_6_figure_supplement_1.pdf]
